# Supplementary material for: Vitamin E Supplementation and Mortality in Healthy People: A Meta-Analysis of Randomised Controlled Trials
Source: Springer Nature journal article supplement (doi:10.1007/s10557-014-6560-7), 2014-11-15
Supplement: MOESM2 [file 8859606]

Appendix 1 MEDLINE (Ovid) Search Strategy (1950 - )

1. exp Vitamin E/

2. vitamin e.mp. [mp=title, abstract, original title, name of substance word, subject heading word, keyword heading word, protocol supplementary concept, rare disease supplementary concept, unique identifier]

3. (tocopherol* or tocotrienol* or alpha?tocopherol*).mp. [mp=title, abstract, original title, name of substance word, subject heading word, keyword heading word, protocol supplementary concept, rare disease supplementary concept, unique identifier]

4. 1 or 2 or 3

5. exp Dietary Supplements/

6. supplement*.mp. [mp=title, abstract, original title, name of substance word, subject heading word, keyword heading word, protocol supplementary concept, rare disease supplementary concept, unique identifier]

7. 5 or 6

8. 4 and 7

9. limit 8 to ("all infant (birth to 23 months)" or "all child (0 to 18 years)")

10. 8 not 9

11. (child* or infan* or pediatr* or paediatr*).mp. [mp=title, abstract, original title, name of substance word, subject heading word, keyword heading word, protocol supplementary concept, rare disease supplementary concept, unique identifier]

12. 10 not 11

13. exp Pregnancy/ or exp Pregnant Women/

14. (pregnan* or expectant or expecting).mp. [mp=title, abstract, original title, name of substance word, subject heading word, keyword heading word, protocol supplementary concept, rare disease supplementary concept, unique identifier]

15. 13 or 14

16. 12 not 15

17. clinical trial*.af.

18. random*.ti,ab.

19. placebo.ti,ab.

20. dt.fs.

21. (trial or trials).ti,ab.

22. groups.ti,ab.

23. 17 or 18 or 19 or 20 or 21 or 22

24. Animals/

25. Humans/

26. 24 and 25

27. 24 not 26

28. 23 not 27

29. 16 and 28

30. (vitamin e or tocopherol* or tocotrienol* or alpha?tocopherol*).mp. [mp=title, abstract, original title, name of substance word, subject heading word, keyword heading word, protocol supplementary concept, rare disease supplementary concept, unique identifier]

31. exp Vitamin E/ad, ae, po, tu, th, to [Administration & Dosage, Adverse Effects, Poisoning, Therapeutic Use, Therapy, Toxicity]

32. (administ* or dosage* or dose* or dosing or treatment* or therap* or poison* or toxic* or adverse*).ti,ab.

33. 30 and 32

34. 31 or 33

35. limit 34 to ("all infant (birth to 23 months)" or "all child (0 to 18 years)")

36. 34 not 35

37. (child* or infan* or pediatr* or paediatr*).mp. [mp=title, abstract, original title, name of substance word, subject heading word, keyword heading word, protocol supplementary concept, rare disease supplementary concept, unique identifier]

38. 36 not 37

39. exp Pregnancy/ or exp Pregnant women/

40. (pregnan* or expectant or expecting).mp. [mp=title, abstract, original title, name of substance word, subject heading word, keyword heading word, protocol supplementary concept, rare disease supplementary concept, unique identifier]

41. 39 or 40

42. 38 not 41

43. clinical trial*.af.

44. random*.ti,ab.

45. placebo.ti,ab.

46. dt.fs.

47. (trial or trials).ti,ab.

48. groups.ti,ab.

49. 43 or 44 or 45 or 46 or 47 or 48

50. Animals/

51. Humans/

52. 50 and 51

53. 50 not 52

54. 49 not 53

55. 42 and 54

56. 29 or 55

57. limit 56 to english language

58. limit 57 to yr="1966 -Current"
